# Supplementary material for: Preparation of a reduced graphene oxide/zirconia nanocomposite and its application as a novel lubricant oil additive
Source: Royal Society of Chemistry journal article supplement (doi:10.1039/c5ra17440f), 2015-01-01
Supplement: c5ra17440f1.pdf [file c5ra17440f1.pdf]

**Electronic Supporting Information (ESI†)**

**Preparation of reduced graphene oxide/zirconia nanocomposite  
and its application as a novel lubricant oil additive**

Qi Zhou <sup>a</sup>, Jingxia Huang <sup>a</sup>, Jinqing Wang <sup>b,\*</sup>, Zhigang Yang <sup>b</sup>, Sheng Liu <sup>c</sup>,

Zhaofeng Wang <sup>b,\*</sup>, and Shengrong Yang <sup>b</sup>

<sup>a</sup> College of Materials Science and Engineering, Lanzhou University of Technology,  
Lanzhou, 730050, P. R. China.

<sup>b</sup> State Key Laboratory of Solid Lubrication, Lanzhou Institute of Chemical Physics,  
Chinese Academy of Sciences, Lanzhou, 730000, P. R. China.

<sup>c</sup> The Technical Center of Zibo Entry-exit Inspection and Quarantine Bureau, Zibo  
255031, P. R. China

**1. AFM image of rGO**

The surface morphology and structure of as-prepared rGO was observed by a Nanoscope IIIa multimode atomic force microscope (AFM, Veeco) in tapping mode. As shown in Fig. S1, the obtained rGO nanosheets are uniform. Based on the cross section analysis, the thickness of rGO nanosheets is determined to be 2.2 ~ 2.5 nm. It is well known that the theoretical value of a perfectly flat sp<sup>2</sup>-carbon atom network is 0.34 nm, in fact, it is natural that the thickness of monolayer graphene flakes is larger than 0.34 nm. In view of thickness of monolayer rGO (0.87±0.09 nm) reported<sup>[1]</sup>, it

---

\* Corresponding authors.

Tel./Fax: +86 931 4968076. E-mail addresses: jqwang@licp.cas.cn (J. Q. Wang), [zhfwang@licp.cas.cn](mailto:zhfwang@licp.cas.cn) (Z. F. Wang)

can be concluded that the layer number of as-prepared rGO are 2-4 layers. Overall, this result demonstrates that few-layer rGO nanosheets have been effectively synthesized.

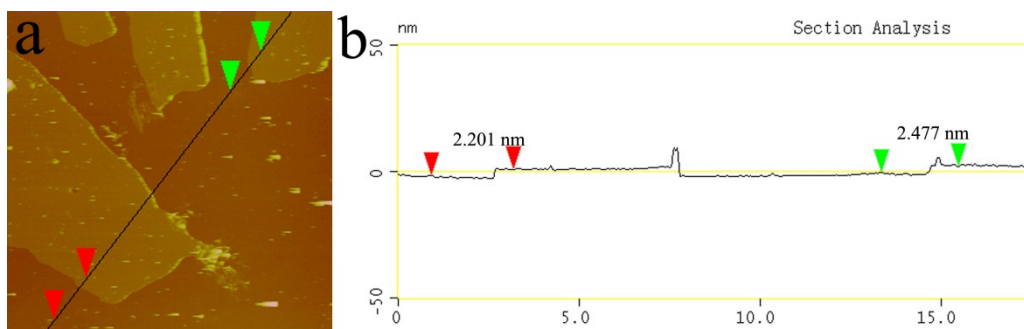

Fig. S1 AFM image of as-prepared rGO nanosheets (a) and the corresponding cross section analysis (b). The scanning area of (a) is  $14 \times 14 \mu\text{m}^2$ . (A color version of this figure can be viewed online)

#### Notes and references

1. D. D. Kulkarni, S. Kim, M. Chyasnachyus, K. Hu, A. G. Fedorov and V. V. Tsukruk, *J. Am. Chem. Soc.*, 2014, **136**, 6546–6549.
